# Supplementary material
Source: HighWire-hosted journal article supplement (https://erj.ersjournals.com/content/60/2/2200102)

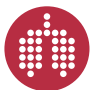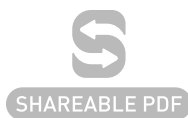

# Metabolomics in pulmonary medicine: extracting the most from your data

Stacey N. Reinke <sup>1</sup>, Romanas Chaleckis <sup>2,3</sup> and Craig E. Wheelock <sup>2,3,4</sup>

<sup>1</sup>Centre for Integrative Metabolomics and Computational Biology, School of Science, Edith Cowan University, Perth, Australia. <sup>2</sup>Unit of Integrative Metabolomics, Institute of Environmental Medicine, Karolinska Institute, Stockholm, Sweden. <sup>3</sup>Gunma Initiative for Advanced Research (GIAR), Gunma University, Maebashi, Japan. <sup>4</sup>Department of Respiratory Medicine and Allergy, Karolinska University Hospital, Stockholm, Sweden.

Corresponding author: Craig E. Wheelock ([craig.wheelock@ki.se](mailto:craig.wheelock@ki.se))

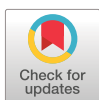

Shareable abstract (@ERSpublications)

The metabolome enables unprecedented insight into biochemistry, providing an integrated signature of the genome, transcriptome, proteome and exposome. Measurement requires rigorous protocols combined with specialised data analysis to achieve its promise. <https://bit.ly/3yPiYkQ>

**Cite this article as:** Reinke SN, Chaleckis R, Wheelock CE. Metabolomics in pulmonary medicine: extracting the most from your data. *Eur Respir J* 2022; 60: 2200102 [DOI: 10.1183/13993003.00102-2022].

This single-page version can be shared freely online.

Copyright ©The authors 2022.

This version is distributed under the terms of the Creative Commons Attribution Non-Commercial Licence 4.0. For commercial reproduction rights and permissions contact [permissions@ersnet.org](mailto:permissions@ersnet.org)

Received: 14 Jan 2022  
Accepted: 14 May 2022

Obstructive lung diseases including asthma and COPD are heterogenous syndromes for which the molecular determinants of individual subtypes of pathogenesis remain unclear. This is a major barrier in understanding disease aetiology and in stratifying patients for treatment as well as in identifying actionable therapeutic targets. There is an unmet need to understand the dysregulated biochemical processes driven by the interaction between genetic and environmental factors [1]. While challenging to study, this complex intersection can be captured *via* the metabolome. Metabolic phenotyping (metabotyping) has demonstrated sufficient molecular resolution to identify phenotypes and endotypes of respiratory disease, including asthma [2–4], COPD [5, 6], respiratory syncytial virus bronchiolitis [7] and cystic fibrosis [8–10].

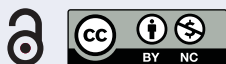

Supplement: inline-supplementary-material-1 [file inline-supplementary-material-1.pdf]
